# Supplementary material for: Analysis of hedgehog signaling in periocular sebaceous carcinoma
Source: Springer Nature journal article supplement (doi:10.1007/s00417-018-3900-5), 2018-02-08
Supplement: MOESM3 [file 15448058]

| Antibody                   | Concentration | Ag retrieval              |
|----------------------------|---------------|---------------------------|
| PTCH<br>Ab39266            | 1 in 1500     | High pH 9<br>20 mins 97°C |
| SMO<br>Ab72130             | 1 in 200      | High pH 9<br>20 mins 97°C |
| Gli1<br>Ab134906           | 1 in 250      | High pH 9<br>20 mins 97°C |
| Gli2<br>Ab26056            | 1 in 150      | Low pH 6<br>20 mins 97°C  |
| Alexa Fluro® 568<br>A11011 | 1 in 500      | -                         |

**Table S1** Summary of antibodies used for immunohistochemistry. Antigen retrieval used the DAKO PT LINK (Dako, Glostrup, Denmark) machine at 97°C for 20 minutes under alkaline (pH 9.0) or acidic (pH 6.0) conditions. Ab= Abcam, Cambridge, UK; A= Thermo Fisher Scientific Inc, Waltham, MA, USA; Ag=Antigen; PTCH1=Patched 1; SMO=smoothened; Gli1=Glioma-associated zinc transcription factor1; Gli2= Glioma-associated zinc transcription factor2=Gli2
